# Supplementary material
Source: publisher figshare collection journal article supplement (https://rs.figshare.com/ndownloader/files/23190719)
Supplement: Supplementary file 1 [file 23190719]

## Sheet: Sheet1
	Raw Data
	for
	Wilsterman, K, MM Alonge, DK Ernst, CA Limber, LA Treidel, and GE Bentley. 2020. Flexibility in the Emergency Life-history Stage: Acute food restriction prevents sickness behavior but not the immune response. Proc. Royal Soc. B. DOI: 10.1098/rspb.2020.0842
	Column ID	Description	Notes
	MarkerID	Bird color ID (chest marking)
	TubeID	Tube labels IDs
	Bands	Bird band combination	(R)ight/(L)eft_colorNUMBER
	Date	Date of experimental replicate
	YEAR	Year of experimental replicate
	TRT	Food access treatment	Ad libitum (AdLib) or food deprivation (FR)
	Inj	Injection treatment	Vehicle (CON) or LPS (LPS)
	Order	Order of individual replicate	First (1) or second (2)
	ExtID	Extraction Number Label for CORT
	Date_Ext	Date of extraction for CORT
	Vol_Ext	Total volume (in microliters) of serum extracted for CORT
	Rd_Ext	Round of extraction for CORT	8-24 samples were extracted in a single round
	Plate	Plate number ID for CORT
	Date	Date of ELISA assay for CORT
	rep1	replicate corticosterone value 1
	rep2	replicate corticosterone value 2
	Calc1	Cortiicosterone value 1, calc'd using std curve
	Calc2	Corticosterone value 2, calc'd using std curve
	CV	CV of Corticosterone replicates
	Average	Average of Calc1 and Calc2
	cC	Average Corticosterone value corrected to ng/mL
	Mass.0	Mass (in grams) at timepoint 0
	Mass.4	Mass (in grams) 4 h after injection
	Mass.24	Mass (in grams) 24 h after injection
	delta_exp	100*(Mass.4 - Mass.0)/Mass.0
	delta_on	100*(Mass.24 - Mass.4)/Mass.0
	Time.Bled	Time bled after entering the aviay at 4 h timpoint
	BleedSec	Time.Bled converted to seconds
	obs	observer set ID
	th	total number of hops
	tf	total number of flights
	tr	total time spent resting (in seconds)
	ta	total number of activities (th + tf)
	Aft_VisitN	number of visits made to the food dish
	Aft_VisitTime	total time spent at the food dish (in seconds)
	Glucose_rawmL	Serum glucose
	TAG_rawum	Serum triglycerides
	lgRSAD	RSAD - fold-difference in expression relative to average expression in AdLib, CON birds
	lfTLR	TLR3 - fold-difference in expression relative to average expression in AdLib, CON birds

## Sheet: LPSmaster
MarkerID	TubeID	Bands	Date	YEAR	TRT	Inj	Order	ExtID	Date_Ext	Vol_Ext	Rd_Ext	Plate	Date	rep1	rep2	Calc1	Calc2	CV	Average	cC	Mass.0	Mass.4	Mass.24	delta_exp	delta_on	Time.Bled	BleedSec	obs	th	tf	tr	ta	Aft_VisitN	Aft_VisitTime	Glucose_rawmL	TAG_rawum	lgRSAD	lfTLR
1Blue	1B	Purple/Pink (L)	2017-12-08	2017	FR	LPS	1	452	2019-07-24	5	19	7	2019-07-25	51.0812	50.9055	489.038	493.187	0.597374	491.113	12.2778	15.61	15.02	14.82	-3.77963	-1.28123			MCG	68	31	659	99		274	2.98207	0.32948
1Blue	1B	Purple/Pink (L)	2017-12-15	2017	FR	CON	2	457	2019-07-24	5	19	7	2019-07-25	49.5485	47.3422	526.436	585.49	7.51076	555.963	13.8991	15.04	14.77	14.54	-1.79521	-1.52926			MCD	118	9	625	127		217	2.94069	0.263055
1Blue 1Lime	BG	ltBlue/ltBlue (L)	2017-12-08	2017	FR	CON	1	450	2019-07-24	5	19	7	2019-07-25	33.9191	33.7531	1160.4	1171.16	0.652647	1165.78	29.1446	13.57	13.38	13.75	-1.40015	2.7266			MCG	91	33	593	124		374	3.03724	0.290333
1Blue 1Lime	BG	ltBlue/ltBlue (L)	2017-12-15	2017	FR	LPS	2	470	2019-07-24	2	20	7	2019-07-25	59.4963	60.5311	324.497	308.058	3.6752	316.278	7.90694	13.53	13.21	12.93	-2.36511	-2.06948			MCD	178	27	478	205		159	3.65793	0.287008
1Hot pink	1H	Or/Blue ®	2017-12-06	2017	AdLib	LPS	1	459	2019-07-24	2	19	7	2019-07-25	78.6304	77.8103	103.825	110.526	4.42069	107.175	2.67938	15.66	14.83	13.76	-5.30013	-6.83269			MCG	73	29	527	102		0	4.27862	0.254455
1Hot pink	1H	Or/Blue ®	2017-12-13	2017	AdLib	CON	2	451	2019-07-24	5	19	7	2019-07-25	65.0901	66.0858	243.167	230.447	3.79807	236.807	5.92018	14.78	14.42	13.37	-2.43572	-7.10419			MDG	64	53	645	117		0	3.86483	0.571412
1Lime	1G	Orange/Pur ®	2017-12-08	2017	FR	LPS	1	463	2019-07-24	5	19	7	2019-07-25	36.7599	36.633	994.844	1001.56	0.47576	998.202	24.955	13.27	13.06	13.1	-1.58252	0.301432			MCG	170	27	598	197		392	2.81655	0.390097
1Lime	1G	Orange/Pur ®	2017-12-15	2017	FR	CON	2	469	2019-07-24	5	20	7	2019-07-25	48.8651	49.1287	544.034	537.176	0.897069	540.605	13.5151	13.26	12.92	12.9	-2.5641	-0.15083			MCD	52	13	605	65		252	3.16138	0.296148
1Lime 1Mint	GM	Yellow (L)	2017-12-08	2017	FR	LPS	1	476	2019-07-24	3	20	7	2019-07-25	39.2883	39.5031	872.142	862.61	0.77708	867.376	21.6844	14.19	13.5	13.72	-4.86258	1.55039			MCG	235	42	224	277		311	3.43724	0.295198
1Lime 1Mint	GM	Yellow (L)	2017-12-15	2017	FR	CON	2	458	2019-07-24	5	19	7	2019-07-25	43.2811	44.7357	713.71	664.511	5.04837	689.111	17.2278	13.34	13.28	13.09	-0.449775	-1.42429			MCD	86	40	399	126		51	3.82345	0.321164
1Lt pink	1L	Green/Purple (L)	2017-12-06	2017	AdLib	CON	1	449	2019-07-24	5	19	7	2019-07-25	61.4097	61.2632	294.631	296.836	0.527281	295.733	7.39333	13.82	13.15	12.38	-4.84805	-5.57164			MCG	90	28	578	118		0	4.5131	0.419696
1Lt pink	1L	Green/Purple (L)	2017-12-13	2017	AdLib	LPS	2	465	2019-07-24	5	19	7	2019-07-25	49.1482	49.7535	536.672	521.271	2.05861	528.972	13.2243	13.25	12.74	12.48	-3.84906	-1.96226			MDG	20	14	626	34		96	4.43034	0.401443
1Lt pink 1Hot pink	LH	White (L)	2017-12-06	2017	AdLib	CON	1														13.49	12.75	12.19	-5.48554	-4.15122			MCG	51	20	472	71		244		0.293929
1Lt pink 1Hot pink	LH	White (L)	2017-12-13	2017	AdLib	LPS	2	478	2019-07-24	5	20	7	2019-07-25	68.2433	69.3952	204.455	191.396	4.66561	197.925	4.94813	12.99	12.5	12.45	-3.77213	-0.384911			MDG	59	29	677	88		251	5.00966	0.768015
1Lt pink 1Purple	LR	Purple (L)	2017-12-06	2017	AdLib	CON	1	453	2019-07-24	5	19	7	2019-07-25	38.3707	39.1907	914.362	876.518	2.98847	895.44	22.386	15.67	14.1	13.34	-10.0191	-4.85003			MCG	48	3	741	51		71	3.7269
1Lt pink 1Purple	LR	Purple (L)	2017-12-13	2017	AdLib	LPS	2	461	2019-07-24	5	19	7	2019-07-25	44.5795	44.97	669.607	656.949	1.34936	663.278	16.582	13.73	13.42	12.91	-2.25783	-3.71449			MDG	76	26	808	102		101	4.54069	0.57089
1Mint	1M	Black/Or (L)	2017-12-08	2017	FR	LPS	1	481	2019-07-24	5	20	7	2019-07-25	42.9687	43.574	724.81	703.481	2.11191	714.145	17.8536	13.79	13.37	13.64	-3.04569	1.95794			MCG	131	44	404	175		355	2.9269	0.30843
1Mint	1M	Black/Or (L)	2017-12-15	2017	FR	CON	2	464	2019-07-24	5	19	7	2019-07-25	35.071	35.0515	1089.22	1090.38	0.0751207	1089.8	27.245	13.57	13.46	13.25	-0.810612	-1.54753			MCD	193	32	382	225		665	3.57517	0.206249
1Purple	1R	dBlue/dBlue (L)	2017-12-06	2017	AdLib	CON	1	456	2019-07-24	5	19	7	2019-07-25	64.4067	66.1249	252.178	229.958	6.51746	241.068	6.0267	13.32	12.8	12.26	-3.9039	-4.05405			MCG	51	17	529	68		163	3.39586	0.437915
1Purple	1R	dBlue/dBlue (L)	2017-12-13	2017	AdLib	LPS	2	468	2019-07-24	5	20	7	2019-07-25	75.6333	76.6291	129.245	120.511	4.94597	124.878	3.12195	12.61	12.37	12.33	-1.90325	-0.317209			MDG	68	16	681	84		188	3.20276	0.582754
2Blue	2B	White/Pur ®	2017-12-08	2017	FR	CON	1	462	2019-07-24	5	19	7	2019-07-25	50.3588	49.9487	506.32	516.4	1.39385	511.36	12.784	13.81	13.04	13.73	-5.57567	4.99638			MCG	157	44	552	201		289	3.12	0.251793
2Blue	2B	White/Pur ®	2017-12-15	2017	FR	LPS	2	477	2019-07-24	5	20	7	2019-07-25	44.3745	44.3159	676.361	678.305	0.202925	677.333	16.9333	13.43	12.94	12.62	-3.64855	-2.38273			MCD	73	21	311	94		217	3.60276	0.291171
2Hot pink	2H	Blue (L)	2017-12-06	2017	AdLib	LPS	1	460	2019-07-24	5	19	7	2019-07-25	50.8078	51.9207	495.507	469.685	3.78348	482.596	12.0649	15.08	14.81	14.11	-1.79045	-4.64191			MCG	54	16	691	70		0	4.29241	0.580642
2Hot pink	2H	Blue (L)	2017-12-13	2017	AdLib	CON	2	480	2019-07-24	5	20	7	2019-07-25	60.6775	62.4347	305.787	279.548	6.3397	292.668	7.31669	13.41	13.04	12.79	-2.75913	-1.86428			MDG	72	45	593	117		68	3.36828	0.550616
2Lime	2G	Pur/Pur®	2017-12-08	2017	FR	CON	1	479	2019-07-24	5	20	7	2019-07-25	64.8948	64.8753	245.718	245.974	0.073661	245.846	6.14614	13.9	12.87	12.83	-7.41007	-0.28777			MCG	155	39	388	194		393	3.21655	0.336742
2Lime	2G	Pur/Pur®	2017-12-15	2017	FR	LPS	2	454	2019-07-24	5	19	7	2019-07-25	56.3919	57.5438	378.268	357.49	3.99383	367.879	9.19697	13.53	12.74	12.62	-5.83888	-0.886918			MCD	153	25	534	178		304	3.39586	0.262261
2Lt pink	2L	Or/Or (L)	2017-12-06	2017	AdLib	LPS	1	475	2019-07-24	5	20	7	2019-07-25	61.4682	61.0582	293.752	299.945	1.47516	296.849	7.42122	12.35	12.27	11.7	-0.647773	-4.61538			MCG	33	17	678	50		204	3.97517	0.292824
2Lt pink	2L	Or/Or (L)	2017-12-13	2017	AdLib	CON	2	474	2019-07-24	5	20	7	2019-07-25	88.6172	89.8082				39.0625	0.976562	12.22	12.2	11.84	-0.163666	-2.94599			MDG	92	37	593	129		157	4.47172	0.464956
2Mint	2M	Blue/White	2017-12-08	2017	FR	CON	1	473	2019-07-24	5	20	7	2019-07-25	52.1453	52.6822	464.637	452.779	1.82806	458.708	11.4677	14.32	14.04	13.86	-1.95531	-1.25698			MCG	141	17	416	158		415	2.98207	0.541207
2Mint	2M	Blue/White	2017-12-15	2017	FR	LPS	2	471	2019-07-24	5	20	7	2019-07-25	65.2658	66.4568	240.887	225.829	4.56295	233.358	5.83395	13.73	13.52	13.65	-1.5295	0.946832			MCD	7	1	890	8		314	2.94069	0.273475
2Purple	2R	WhiteR	2017-12-06	2017	AdLib	LPS	1														13.59	12.94	12.6	-4.78293	-2.50184			MCG	28	6	852	34		437		0.481108
2Purple	2R	WhiteR	2017-12-13	2017	AdLib	CON	2	472	2019-07-24	5	20	7	2019-07-25	42.8809	42.998	727.968	723.761	0.409789	725.864	18.1466	12.9	12.28	12.34	-4.8062	0.465116			MDG	70	19	658	89		450	4.56828	0.613326
dB	5	R_pink0	2018-12-01	2018	AdLib	LPS	1	430	2019-07-24	5	18	8	2019-07-25	53.8188	51.9304	435.471	478.257	6.62222	456.864	11.4216	12.97	12.2	12.63	-5.93678	3.31534	06:12:00	372	SCD	44	12	798	56	0	0			1.46493	0.312878
dB	5	R_pink0	2018-12-08	2018	AdLib	CON	2	433	2019-07-24	5	18	8	2019-07-25	62.4994	63.755	280.667	262.789	4.65221	271.728	6.7932	12.7	12.8	12.91	0.787402	0.866142	05:32:00	332	SCD	117	42	529	159	0	0			0.663658	-0.361278
dBlB	2	R_lblue50_lpink28	2018-12-01	2018	AdLib	CON	1	407	2019-07-24	5	17	8	2019-07-25	79.0499	79.5838	104.806	100.831	2.7338	102.819	2.57047	15.18	15.13	14.45	-0.329381	-4.47958	01:23:00	83	SCD	70	46	572	116	0	0			-0.0878783	0.147528
dBlB	8	R_lblue50_lpink28	2018-12-08	2018	AdLib	LPS	2	443	2019-07-24	5	18	7	2019-07-25	75.2233	74.413	132.929	140.364	3.84721	136.647	3.41617	13.47	13.23	13.3	-1.78174	0.519673	01:31:00	91	SCD	66	18	746	84	0	0			1.89017	0.999945
dBlGdB	1	R_pink82_black99	2018-12-01	2018	AdLib	CON	1	408	2019-07-24	5	17	8	2019-07-25	89.4706	90.3406	40.6533	36.4575	7.69512	38.5554	0.963886	16.27	16.16	16.35	-0.676091	1.16779	00:45:00	45	SCD	85	22	674	107	1	93			0.962303	0.757228
dBlGdB	3	R_pink82_black99	2018-12-08	2018	AdLib	LPS	2	419	2019-07-24	5	18	8	2019-07-25	77.5273	76.6573	116.608	123.673	4.15825	120.141	3.00352	15.3	15.09	15.07	-1.37255	-0.130719	00:39:00	39	SCD	47	15	690	62	1	33			1.98258	1.18991
dG	3	R_white29_green29	2018-12-01	2018	AdLib	LPS	1	448	2019-07-24	5	18	8	2019-07-25	78.1106	79.7222	112.004	99.8142	8.13855	105.909	2.64773	13.58	13.12	13.15	-3.38733	0.220913	02:35:00	155	SCD	118	33	610	151	1	75			2.16817	0.701961
dG	4	R_white29_green29	2018-12-08	2018	AdLib	CON	2	438	2019-07-24	5	18	8	2019-07-25	60.1958	60.8087	316.079	306.307	2.22024	311.193	7.77982	14.72	14.25	14.4	-3.19293	1.01902	03:50:00	230	SCD	218	29	446	247	0	0			-0.0654131	-0.334647
dGlG	8	L_yellow40	2018-12-01	2018	AdLib	LPS	1	442	2019-07-24	5	19	8	2019-07-25	74.2449	75.896	144.565	130.055	7.47205	137.31	3.43275	15.8	15.5	15.56	-1.89873	0.379747	01:46:00	106	SCD	89	16	699	105	0	0			2.04726	1.29444
dGlG	1	L_yellow40	2018-12-08	2018	AdLib	CON	2	436	2019-07-24	5	18	8	2019-07-25	92.3773	93.6428				39.0625	0.976562	15.44	15.35	14.91	-0.582902	-2.84974	00:32:00	32	SCD	83	29	586	112	0	0			0.431469	0.450408
lB	7	R_lpink38_white0	2018-12-01	2018	AdLib	CON	1	425	2019-07-24	5	18	8	2019-07-25	59.7014	61.8864	324.152	289.748	7.9255	306.95	7.67375	13.63	13.45	13.22	-1.32062	-1.68745	04:04:00	244	SCD	80	27	673	107	1	75			0.46827	-0.175473
lB	7	R_lpink38_white0	2018-12-08	2018	AdLib	LPS	2	446	2019-07-24	5	18	8	2019-07-25	77.033	77.9129	120.593	113.553	4.25218	117.073	2.92683	13.51	13.5	13.23	-0.0740192	-1.99852	02:23:00	143	SCD	63	4	864	67	0	0			1.7681	0.105255
lBdG	4	R_white0_lblue27	2018-12-01	2018	AdLib	CON	1	447	2019-07-24	5	18	8	2019-07-25	65.1985	64.0714	243.372	258.432	4.24426	250.902	6.27256	14.38	14.52	14.35	0.973574	-1.1822	04:04:00	244	SCD	184	64	419	248	0	0			-0.480723	-0.0954776
lBdG	2	R_white0_lblue27	2018-12-08	2018	AdLib	LPS	2	445	2019-07-24	5	18	8	2019-07-25	78.951	79.742	105.552	99.6693	4.05368	102.611	2.56526	15.15	14.66	14.38	-3.23432	-1.84818	02:07:00	127	SCD	140	17	641	157	0	0			1.92816	0.65418
lG	6	R_white45	2018-12-01	2018	AdLib	LPS	1	427	2019-07-24	5	18	8	2019-07-25	51.3767	52.3555	491.572	468.278	3.43219	479.925	11.9981	13.75	13.4	13.2	-2.54545	-1.45455	05:27:00	327	SCD	82	38	485	120	2	89			-0.548783	0.326128
lG	6	R_white45	2018-12-08	2018	AdLib	CON	2	428	2019-07-24	5	18	8	2019-07-25	55.9939	56.6563	390.755	378.016	2.34337	384.385	9.60963	13.94	13.59	13.34	-2.51076	-1.7934	04:07:00	247	SCD	119	43	518	162	0	0			-1.89169	-0.388288
Or	3	L_lblue25_brown0	2018-12-03	2018	FR	LPS	1	444	2019-07-24	5	18	8	2019-07-25	35.1327	36.4081	1138.01	1060.29	5.00039	1099.15	27.4788	15.25	14.4	14.72	-5.57377	2.09836	03:55:00	235	CMS	128	41	650	169	2	895			-0.250971	0.614102
Or	3	L_lblue25_brown0	2018-12-10	2018	FR	CON	2	422	2019-07-24	5	18	8	2019-07-25	38.692	40.0761	936.983	870.76	5.18071	903.871	22.5968	13.6	13.34	13.61	-1.91176	1.98529	03:50:00	230	MMS	98	74	802	172	2	425			-1.67778	-0.354062
OrPiOr	4	L_dgreen67_lgreen0	2018-12-03	2018	FR	CON	1	435	2019-07-24	5	18	8	2019-07-25	33.9167	33.7189	1219.03	1232.9	0.800048	1225.97	30.6492	13.47	12.81	13.1	-4.89978	2.15293	02:13:00	133	CMS	146	47	628	193	3	570			-0.409437	-0.608626
OrPiOr	5	L_dgreen67_lgreen0	2018-12-10	2018	FR	LPS	2	426	2019-07-24	5	18	8	2019-07-25	69.8453	71.1404	188.159	174.528	5.31518	181.344	4.53359	13.36	12.52	13.32	-6.28743	5.98802	05:15:00	315	MMS	74	34	872	108	0	0			1.98695	0.574147
Pi	8	L_lblue70_white0	2018-12-03	2018	FR	CON	1	440	2019-07-24	5	18	8	2019-07-25	37.1496	38.2471	1018.16	959.556	4.19063	988.858	24.7215	12.42	11.8	12.68	-4.99195	7.08535	06:55:00	415	CMS	153	40	734	193	2	385			-0.157402	-0.369652
Pi	4	L_lblue70_white0	2018-12-10	2018	FR	LPS	2	423	2019-07-24	5	18	8	2019-07-25	48.0647	49.3499	579.534	543.608	4.52364	561.571	14.0393	12.54	11.72	12.21	-6.53907	3.9075	00:38:00	38	MMS	56	12	886	68	2	352			1.72395	0.270534
PiPurPi	2	R_dblue92_red62	2018-12-03	2018	FR	CON	1	421	2019-07-24	5	18	8	2019-07-25	22.5666	22.8138	2554	2506.29	1.33341	2530.15	63.2536	13.59	13.1	12.8	-3.60559	-2.20751	02:14:00	134	CMS	94	36	732	130	1	499			-0.900245	-0.389032
PiPurPi	2	R_dblue92_red62	2018-12-10	2018	FR	LPS	2	429	2019-07-24	5	18	8	2019-07-25	42.2117	43.2696	779.187	738.008	3.83836	758.598	18.9649	13.55	12.8	13.26	-5.53506	3.39483	03:00:00	180	MMS	175	38	861	213	0	0			0.444177	-0.0655242
Pur	1	R_red95_yellow56	2018-12-03	2018	FR	LPS	1	434	2019-07-24	5	18	8	2019-07-25	29.1809	29.9224	1618.04	1544.96	3.26724	1581.5	39.5375	13.32	12.63	13.08	-5.18018	3.37838	00:54:00	54	CMS	132	53	587	185	1	1058			2.05184	1.00191
Pur	1	R_red95_yellow56	2018-12-10	2018	FR	CON	2	424	2019-07-24	5	18	8	2019-07-25	38.5733	39.9278	942.939	877.579	5.07722	910.259	22.7565	13.06	12.71	13.3	-2.67994	4.51761	00:50:00	50	MMS	125	83	831	208	1	29			0.284408	-0.0898177
PurRed	6	R_green23_lblue3	2018-12-03	2018	FR	LPS	1	420	2019-07-24	5	18	8	2019-07-25	44.4955	45.1481	693.359	670.838	2.33469	682.098	17.0525	12.91	12.23	12.37	-5.26723	1.08443	05:50:00	350	CMS	172	37	751	209	1	232			1.69621	0.849018
PurRed	8	R_green23_lblue3	2018-12-10	2018	FR	CON	2	418	2019-07-24	5	18	8	2019-07-25	57.5362	56.943	361.683	372.622	2.10669	367.152	9.17881	13.06	12.39	12.88	-5.13017	3.75191	07:40:00	460	MMS	113	41	833	154	1	197			-0.694792	-0.399863
PurRedPi	7	R_lblue20_grey25	2018-12-03	2018	FR	LPS	1	439	2019-07-24	5	18	8	2019-07-25	32.8687	32.9576	1294.95	1288.27	0.365842	1291.61	32.2903	12.7	12.12	12.47	-4.56693	2.75591	06:02:00	362	CMS	85	46	696	131	2	1356
PurRedPi	6	R_lblue20_grey25	2018-12-10	2018	FR	CON	2	432	2019-07-24	5	18	8	2019-07-25	42.4094	43.6947	771.293	722.166	4.65199	746.729	18.6682	12.56	12.37	12.7	-1.51274	2.62739	06:21:00	381	MMS	60	43	825	103	1	214
Red	5	R_lgreen0	2018-12-03	2018	FR	CON	1	437	2019-07-24	5	18	8	2019-07-25	42.973	44.8515	749.296	680.972	6.75573	715.134	17.8783	13.28	12.52	13.08	-5.72289	4.21687	01:24:00	84	CMS	105	107	529	212	1	661			0.955317	-0.546156
Red	7	R_lgreen0	2018-12-10	2018	FR	LPS	2	431	2019-07-24	5	18	8	2019-07-25	41.5987	42.4984	804.262	767.771	3.2828	786.016	19.6504	13.04	12.59	13.52	-3.45092	7.1319	06:48:00	408	MMS	95	22	882	117	1	358			2.65784	0.78003
